# Supplementary material
Source: MDPI journal article supplement (https://www.mdpi.com/2073-4336/6/4/495)
Supplement: s1 [file s1]

# Supplementary File

### Topology of 2x2 Games

• Symmetric games on diagonal axis, payoffs combine to make asymmetric games  
 • Payoff swaps link neighboring games  
 1↔2 Low swaps form tiles of 4 games  
 2↔3 Middle swaps join tiles into 4 layers  
 3↔4 High swaps bridge layers  
 • Layers differ by alignment of best payoffs  
 L4 Column L1 Discord  
 L3 Win-win L2 Row  
 • Layer quadrants differ in dominant strategies (D) and equilibria (E)  
 • Pd scrolled to center, so layers and table are toruses, wrap side-to-side & top-to-bottom

| Payoff Families |               |
|-----------------|---------------|
| Win-win 4,4     | Stag Hunt     |
| Biased 4,3      | Battle        |
| Second Best 3,3 |               |
| Unfair 4,2      |               |
| Sad 3,2         |               |
| Traps 3,2/2,2   | Dilemma Alibi |
| Cyclic 0,0      | Indeterminate |

2x2atlas.org © CC-BY-SA

### Activities for 2x2 Cards

- Play.** Shuffle, pick a card and play, considering solution concepts
- Layouts.** Arrange by topology axis, differentiation, neighbors, etc.
- Story.** Pick a card and create a story where preferences transform
- Path.** Pick two cards and find cards for the pathway between them.
- Adapt games**
  - Fish.* Ask for cards by properties: ties, dominance, externalities, etc.
  - Dominos.* Add neighboring cards (half or full swap)
  - Concentration.* Pair neighbors
  - Rummy.* Sets of 3 neighbors

**Options:** Start with just strict games  
 • Two cards make an asymmetric game  
 • Work in teams • Share with #2x2atlas

see Robinson & Goforth *Topology of 2x2 Games*  
 Bruns *Atlas of 2x2 Games 2x2atlas.org*  
 2x2atlas.org © CC-BY-SA

### Differentiation and Simplification

Half-swaps:  
 Making ties simplifies  
 Breaking ties differentiates  
 also see *Neighbors*

2x2atlas.org © CC-BY-SA

### Symmetric Neighbors

Swaps in adjoining payoffs link neighbors  
 3↔4: Prisoner's Dilemma ↔ Stag Hunt  
 Games with ties lie between strict games  
 Half-swap links make or break ties

■ **Faces** ■ **Edges** ● **Vertices**  
 see 2x2atlas.org for more © CC-BY-SA

## 2x2 Symmetric Games

### Cards for All the 2x2 Symmetric Ordinal Games

Bryan Bruns  
 bryanbruns@bryanbruns.com  
 Working Document  
 September 23, 2015  
 2x2atlas.org © CC-BY-SA

### Contents

#### Maps

- Topology of 2x2 Games
- Legend
- Activities for 2x2 Cards
- Differentiation & Simplification
- Symmetric Neighbors
- Expanded Topology

#### Cards

- Discord: Strict Layer 1 & Key
- Win-win: Strict Layer 3
- Low Ties
- Middle Ties
- High Ties Layer 3
- High Ties Layer 1: Variants
- Double Ties
- Simplest: Triple, Basic, Zero

*Dedicated to the memory of  
 John Forbes Nash  
 1928-2015*

*who liked to play games,  
 as well as  
 think about them*

Half-swaps make or break ties in the expanded topology

2x2atlas.org © CC-BY-SA

Figure S1. 2 × 2 Game Cards: Maps.

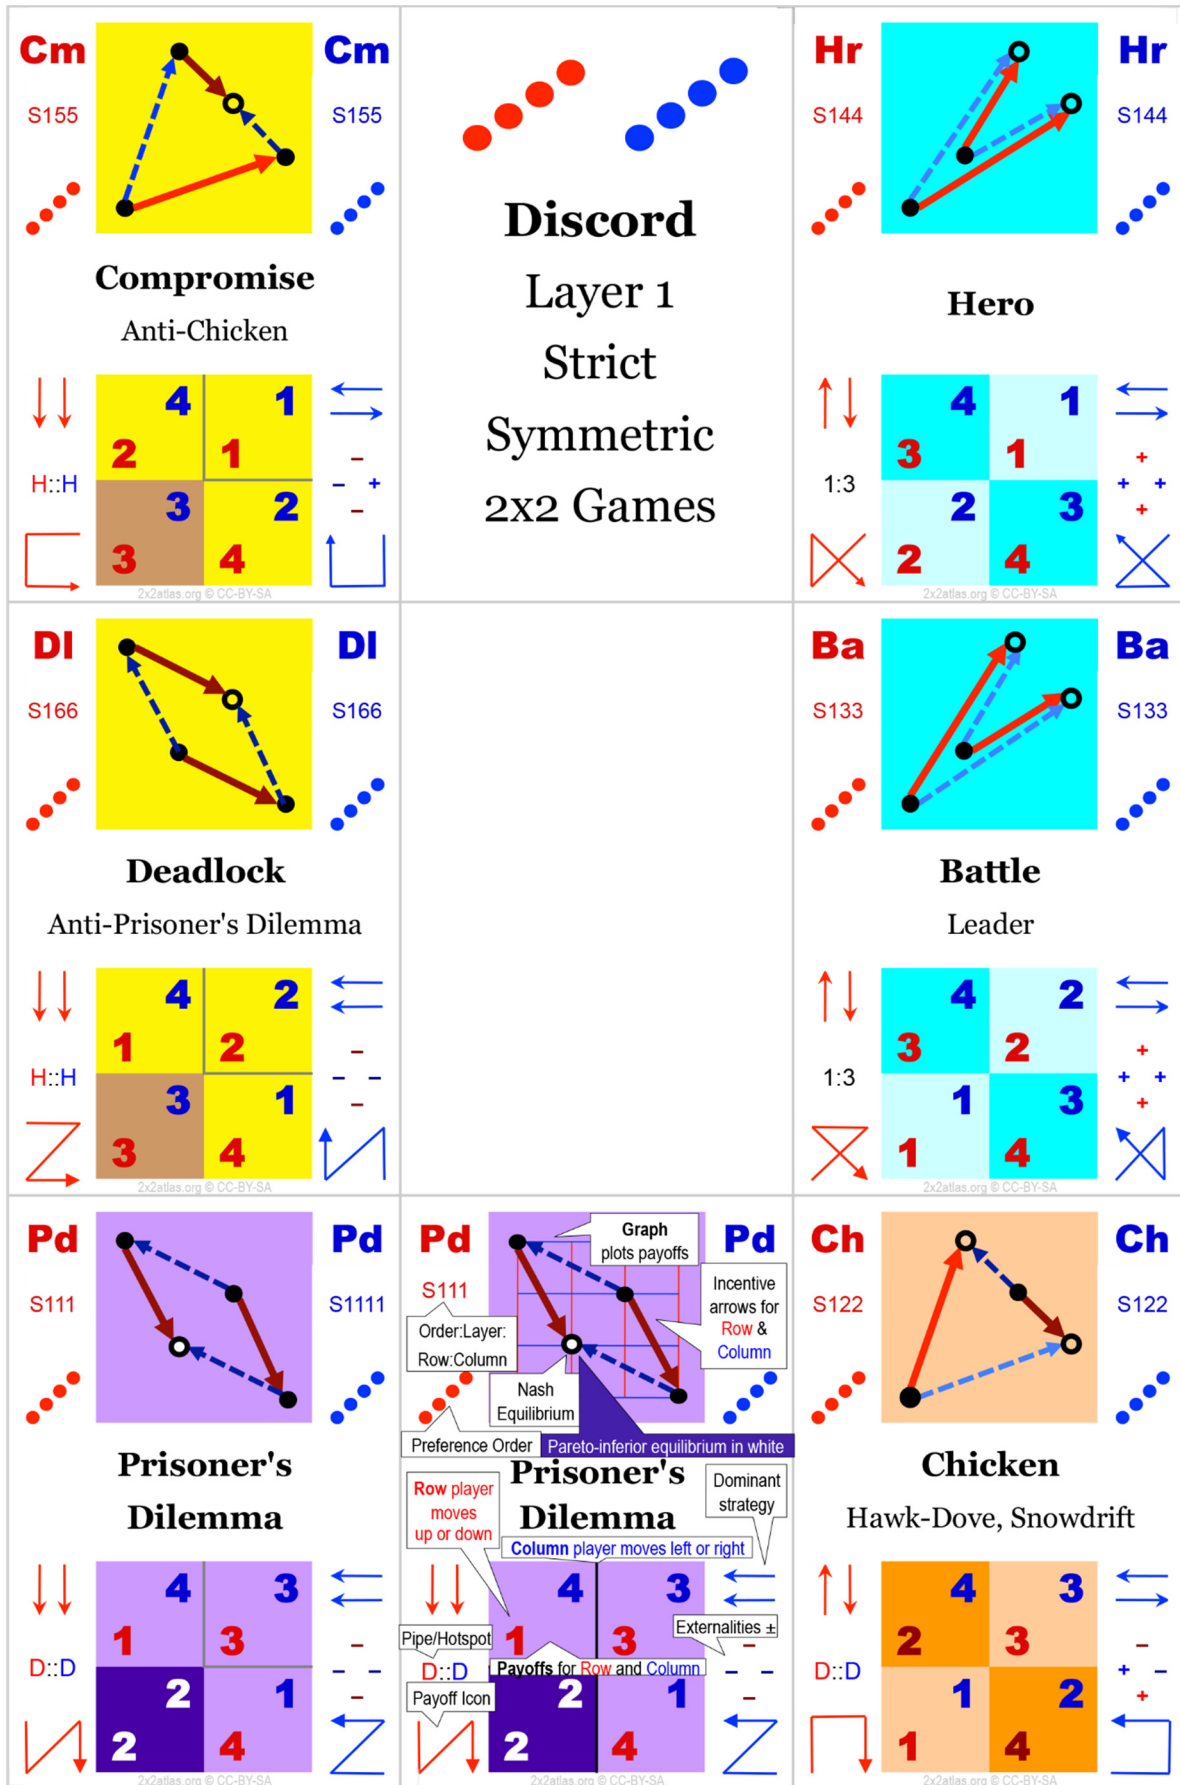

Figure S2. 2 × 2 Game Cards: Discord Layer 1.

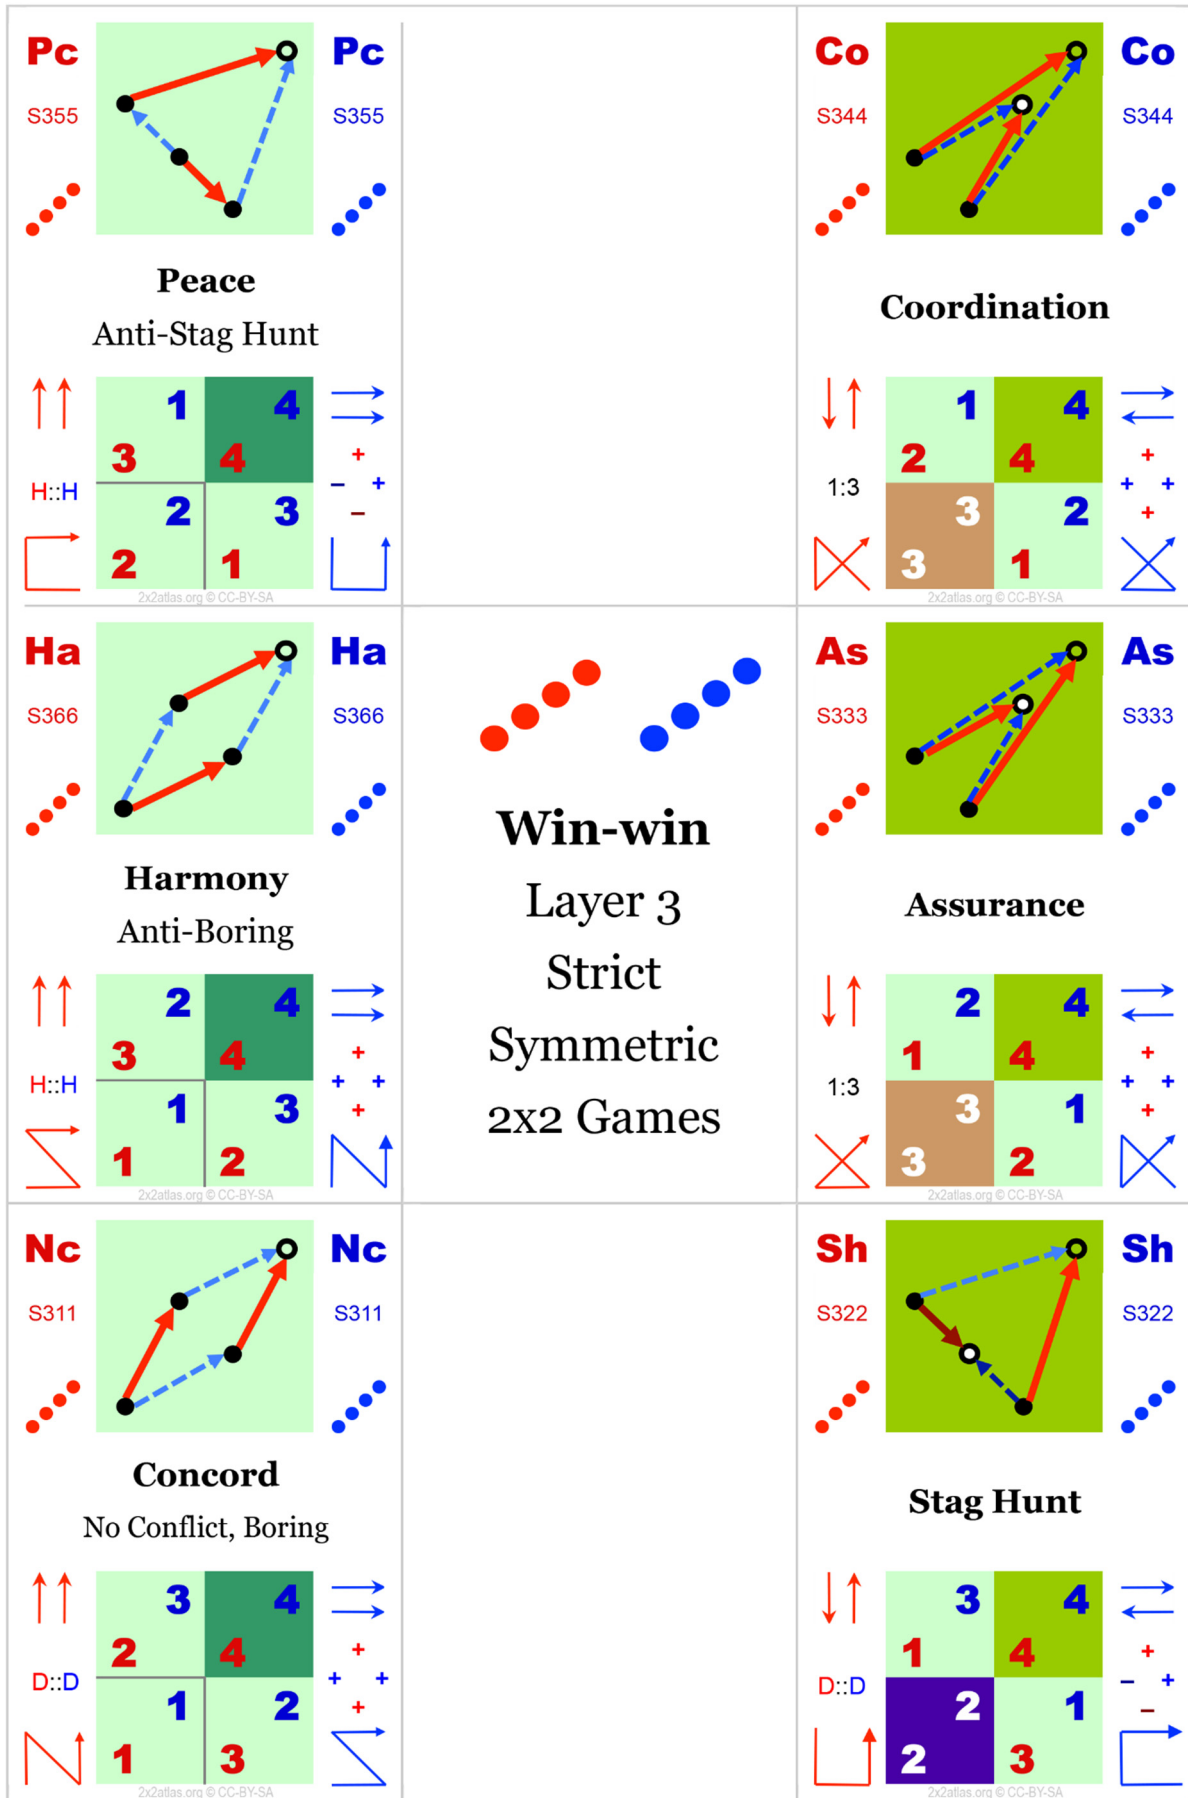

Figure S3. 2 × 2 Game Cards: Win-win Layer 3.

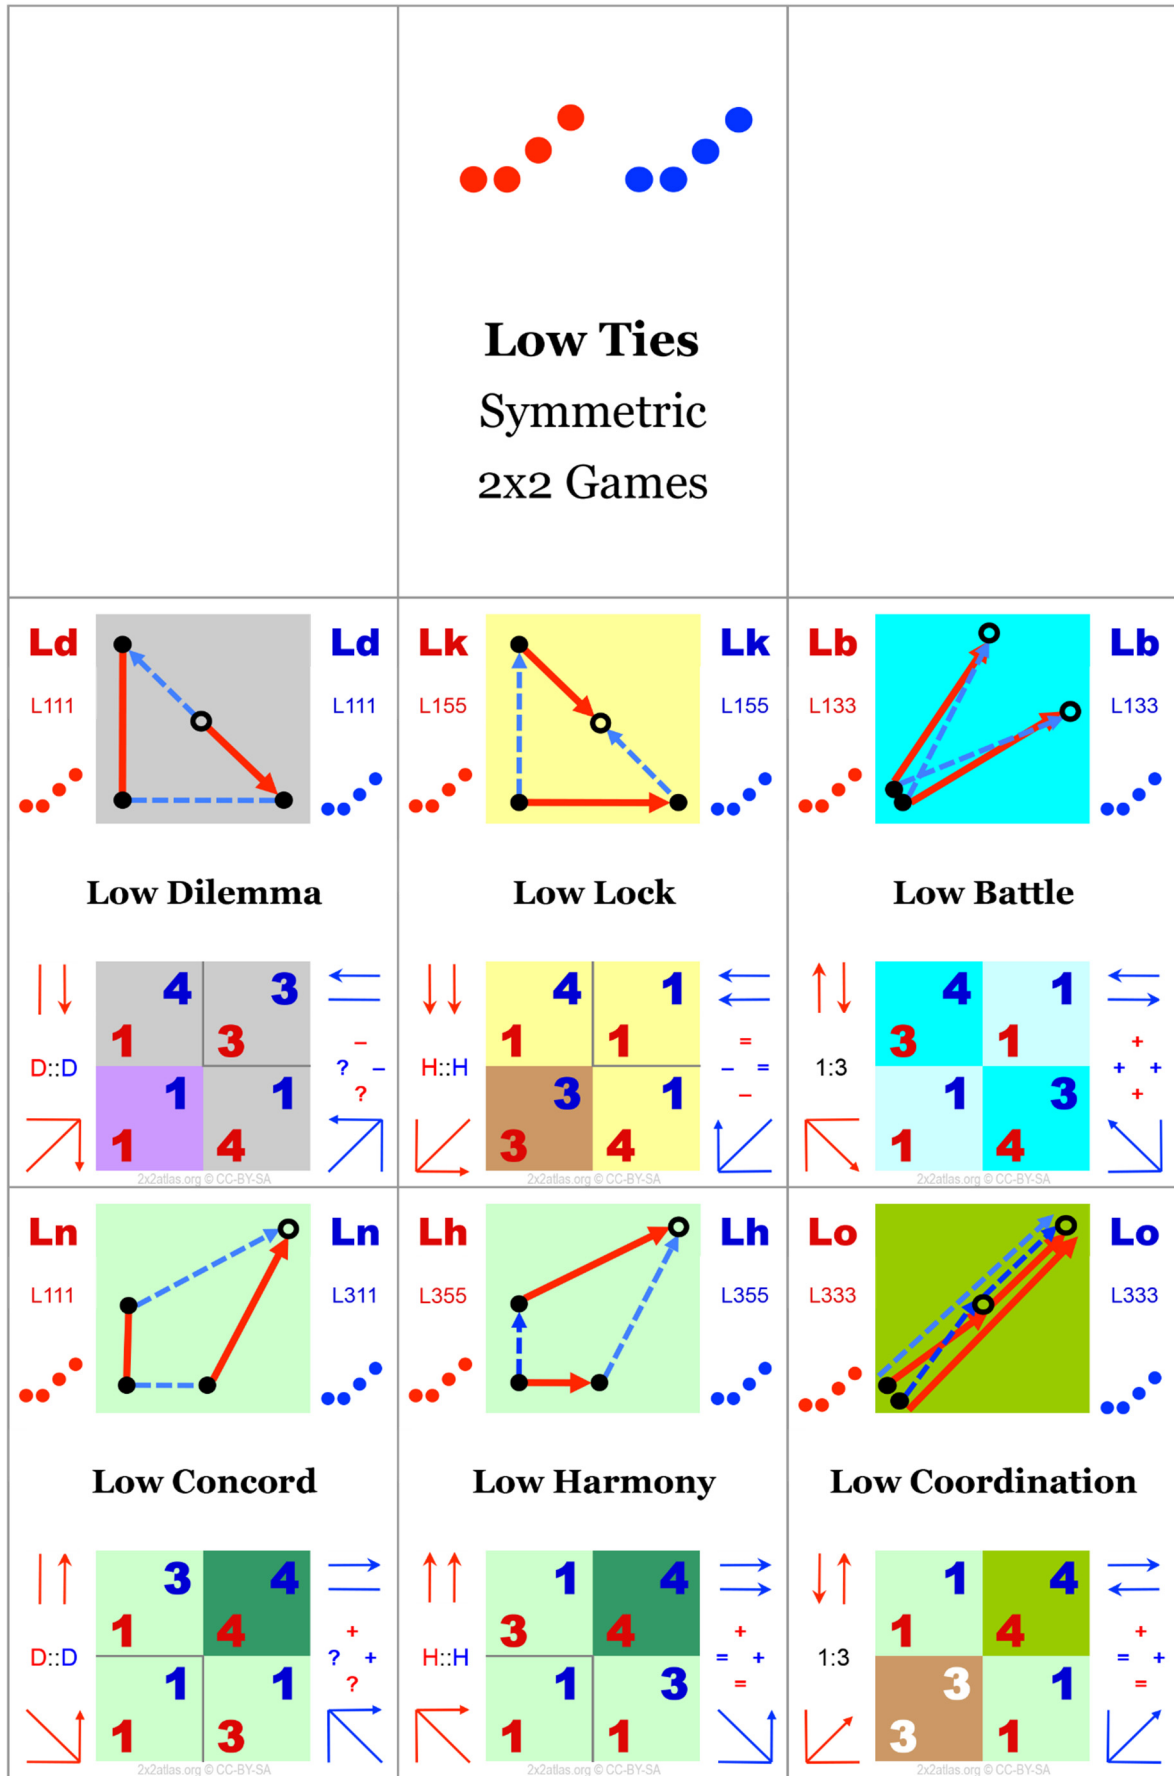

Figure S4. 2 × 2 Game Cards: Low Ties.

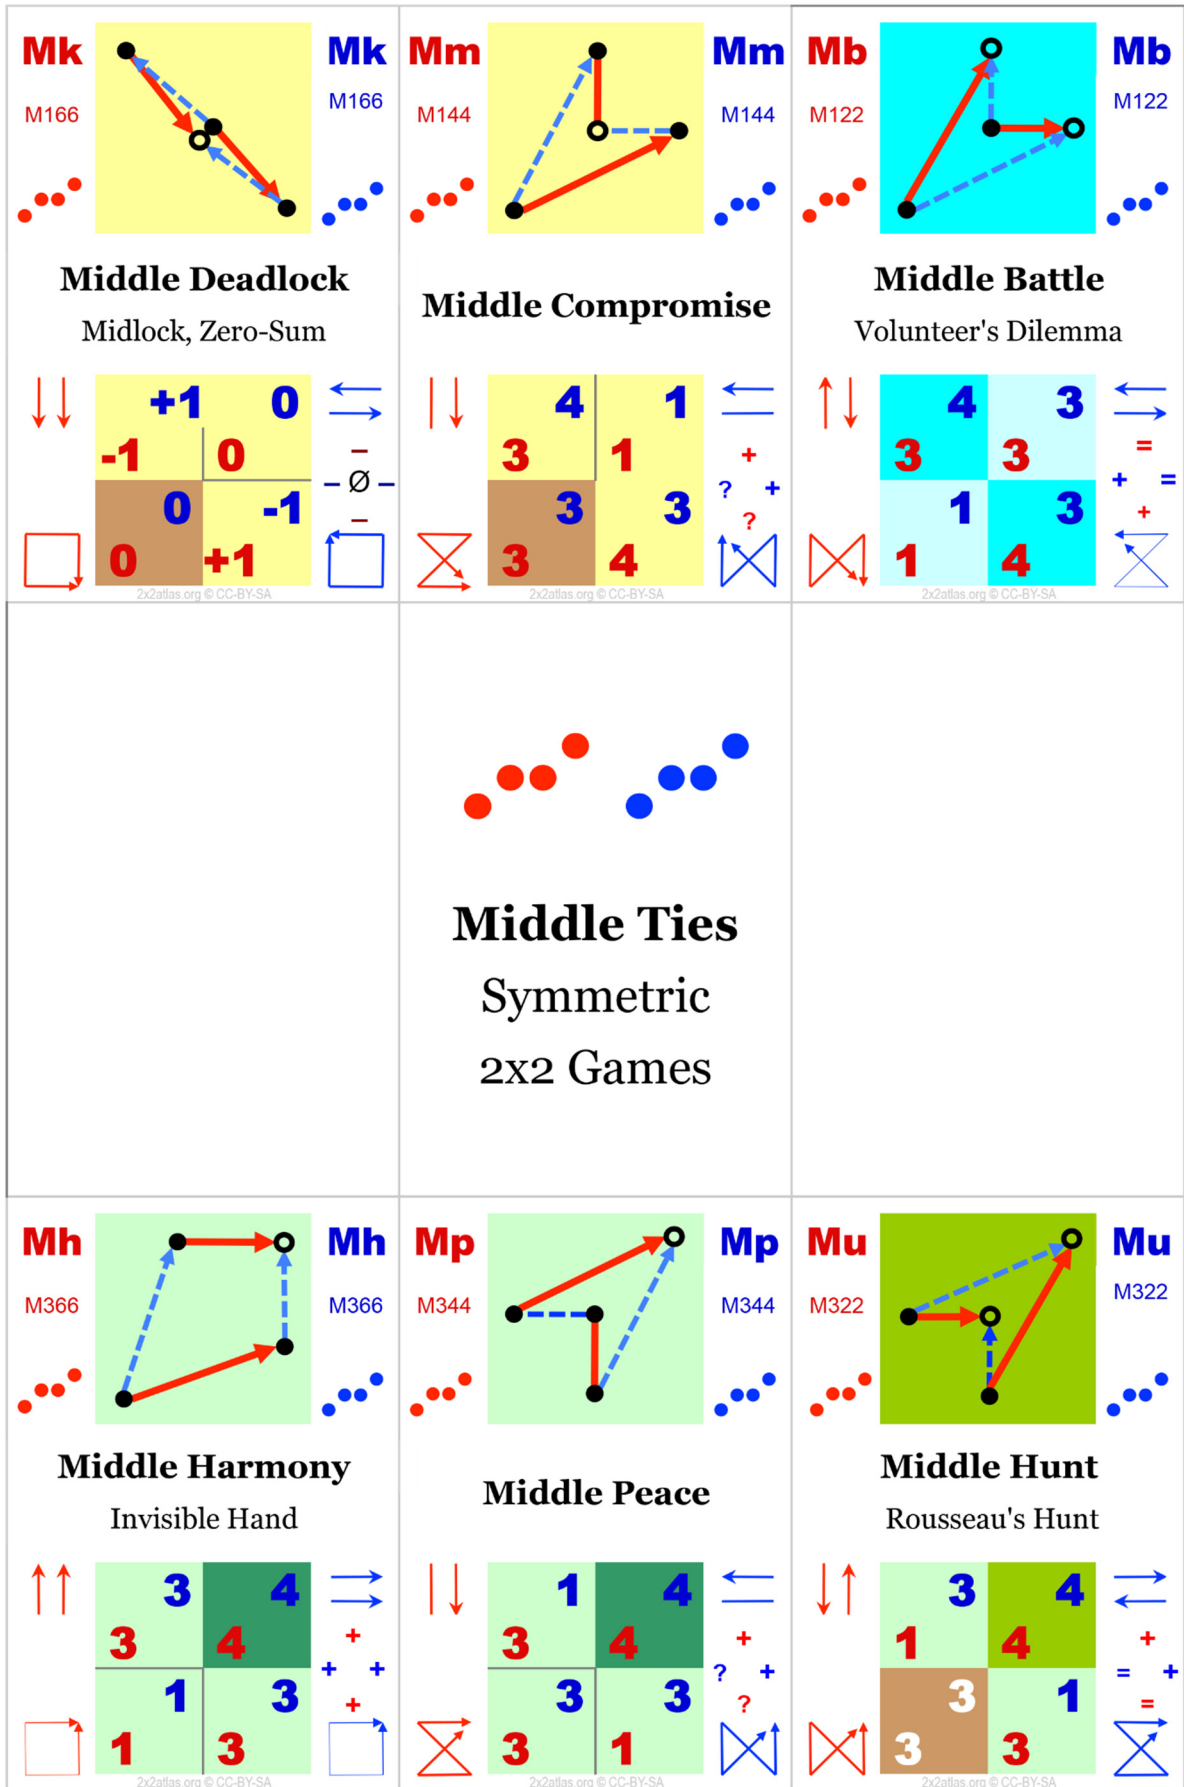

Figure S5. 2 × 2 Game Cards: Middle Ties.



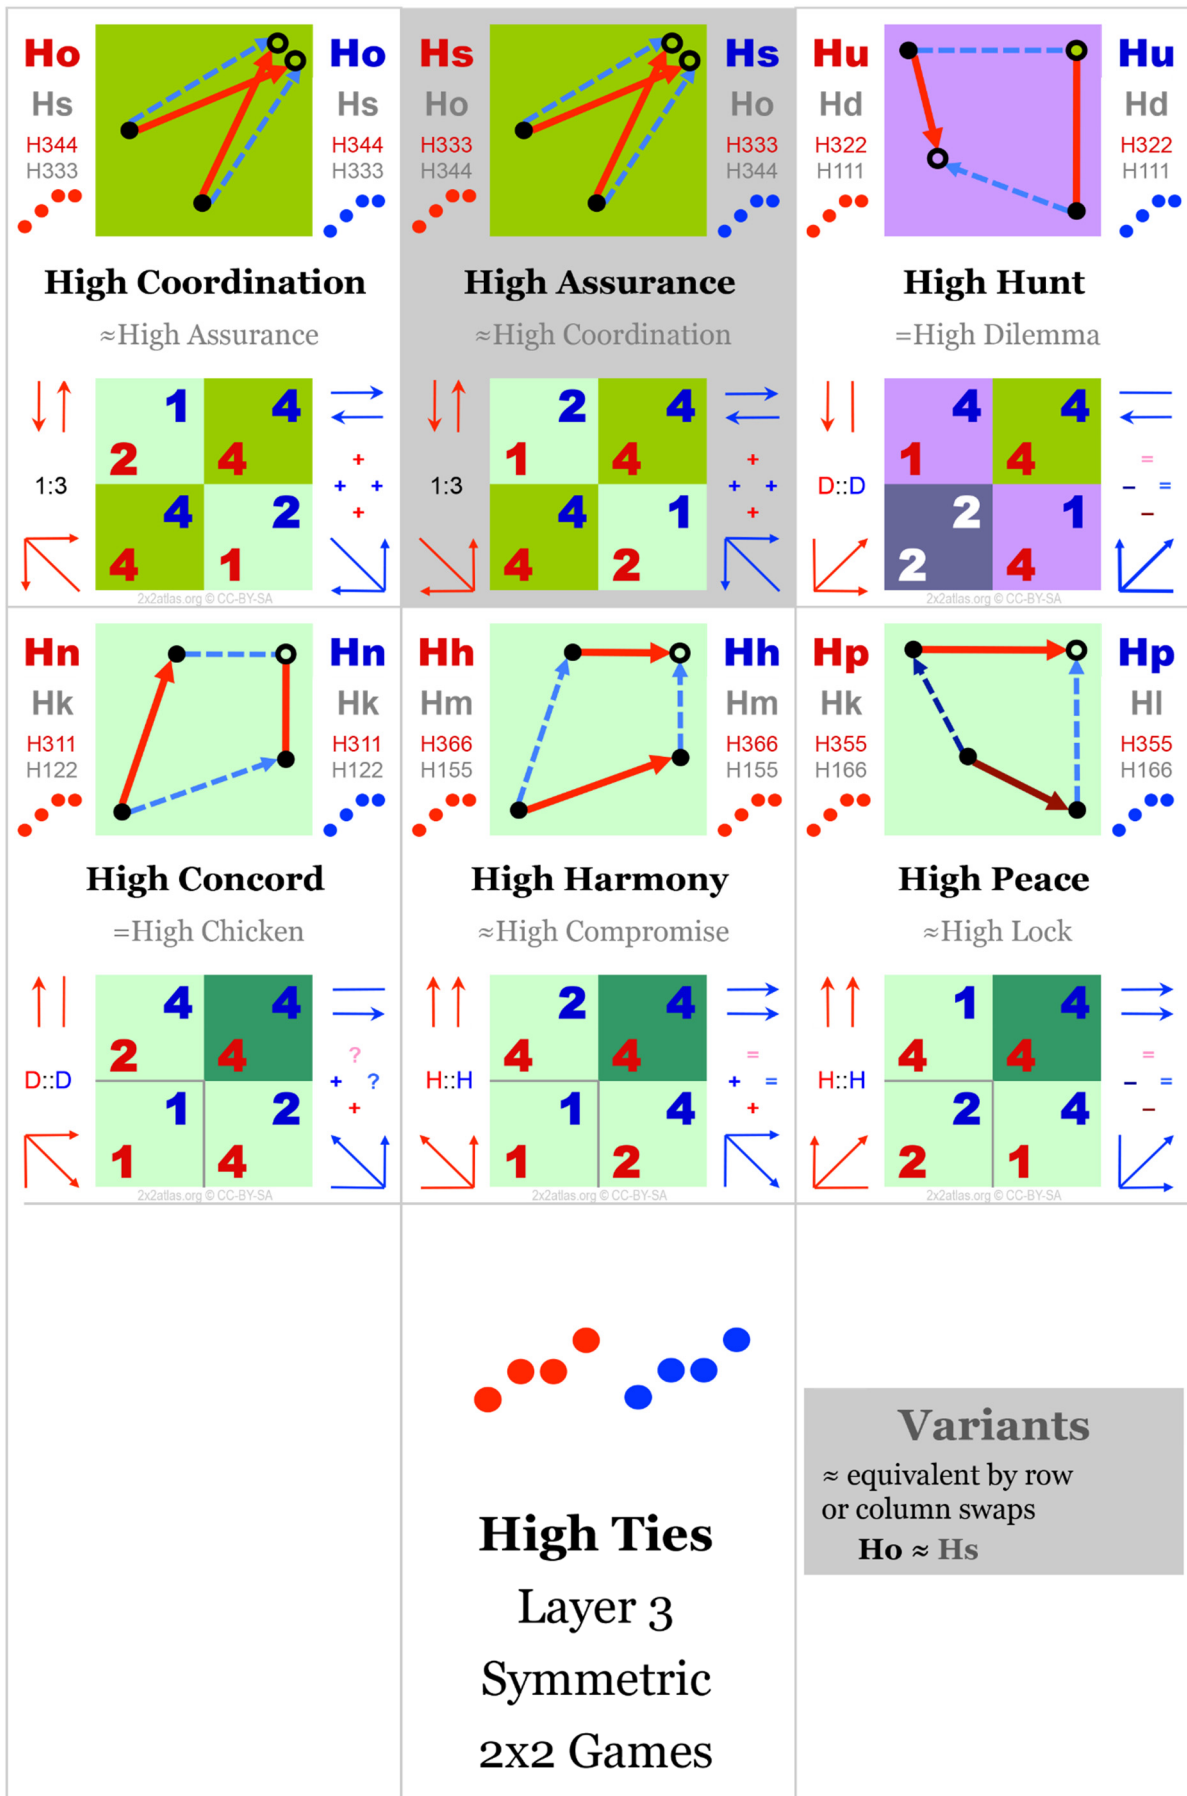

Figure S6. 2 × 2 Game Cards: High Ties Layer 3.

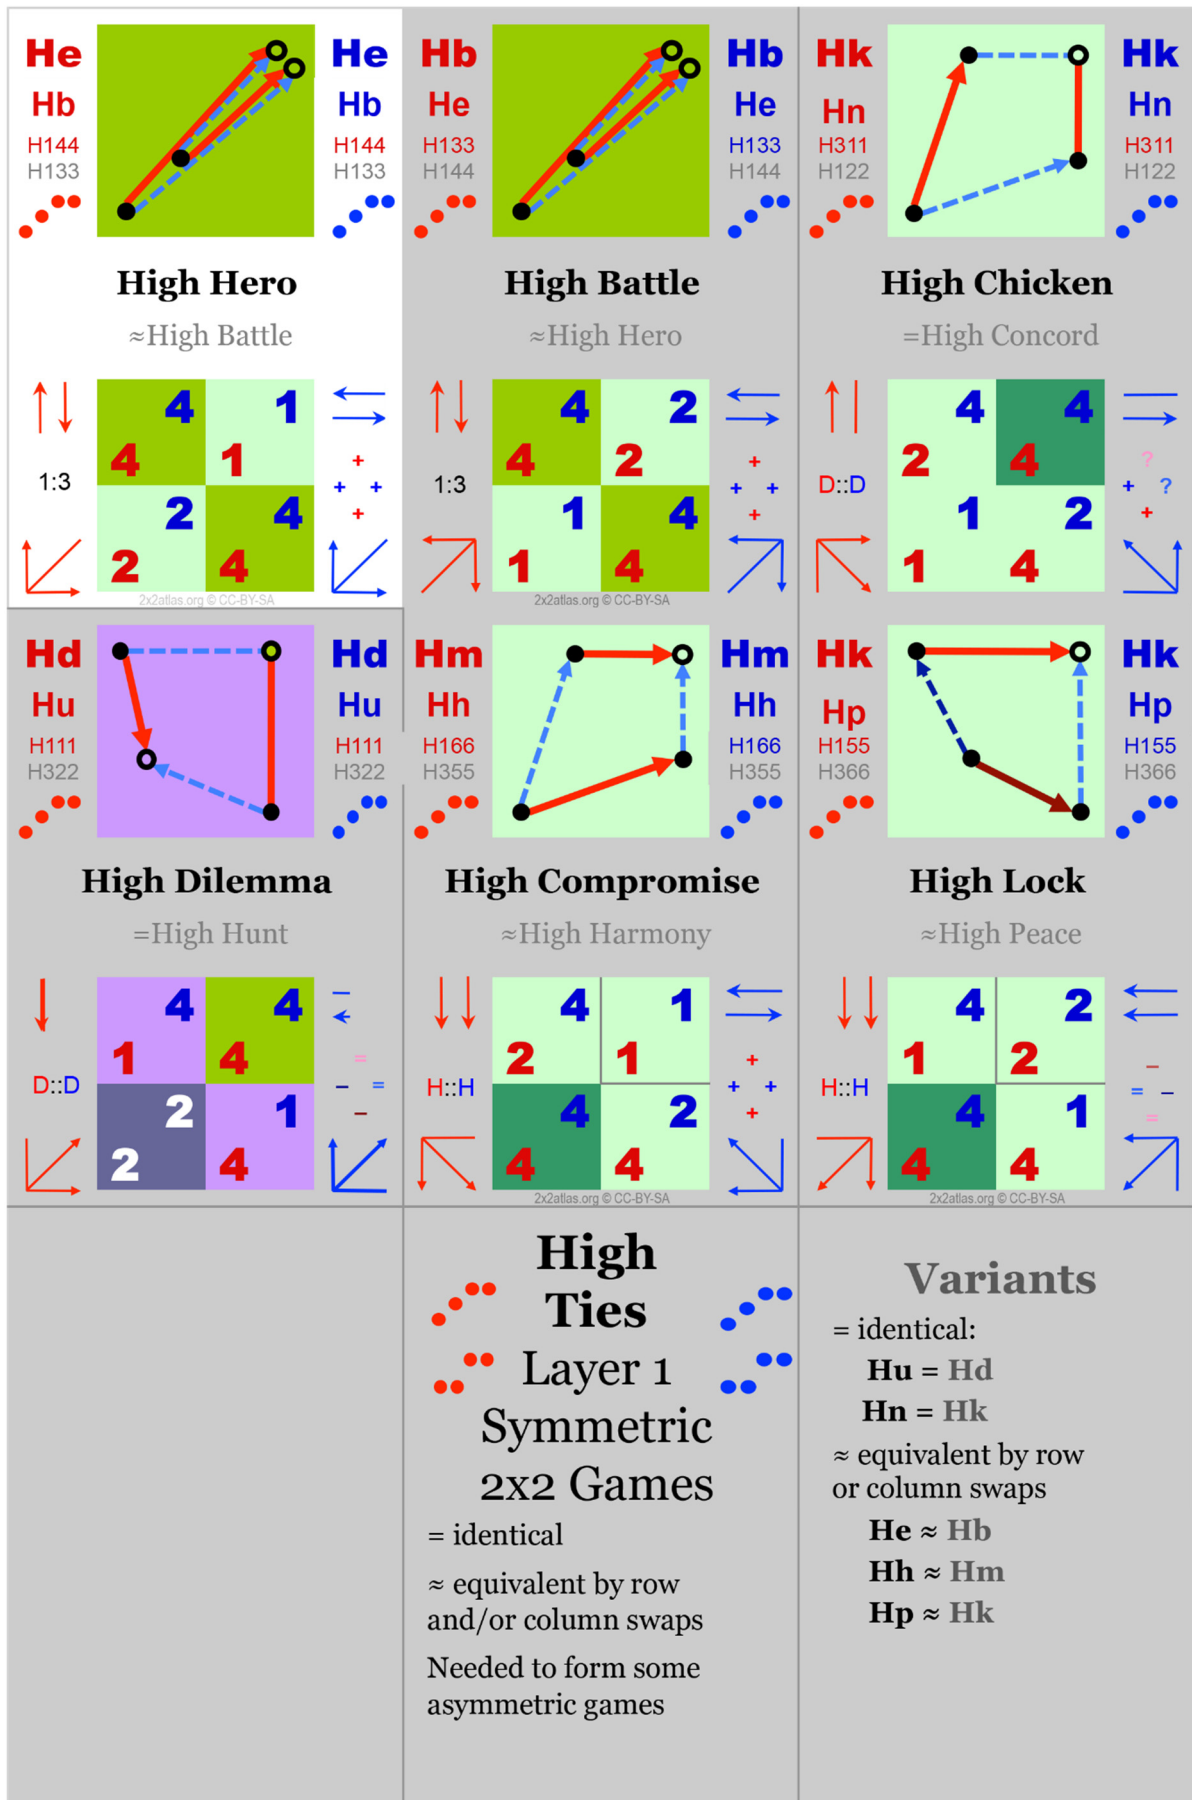

Figure S7. 2 × 2 Game Cards: High Ties Layer 1.

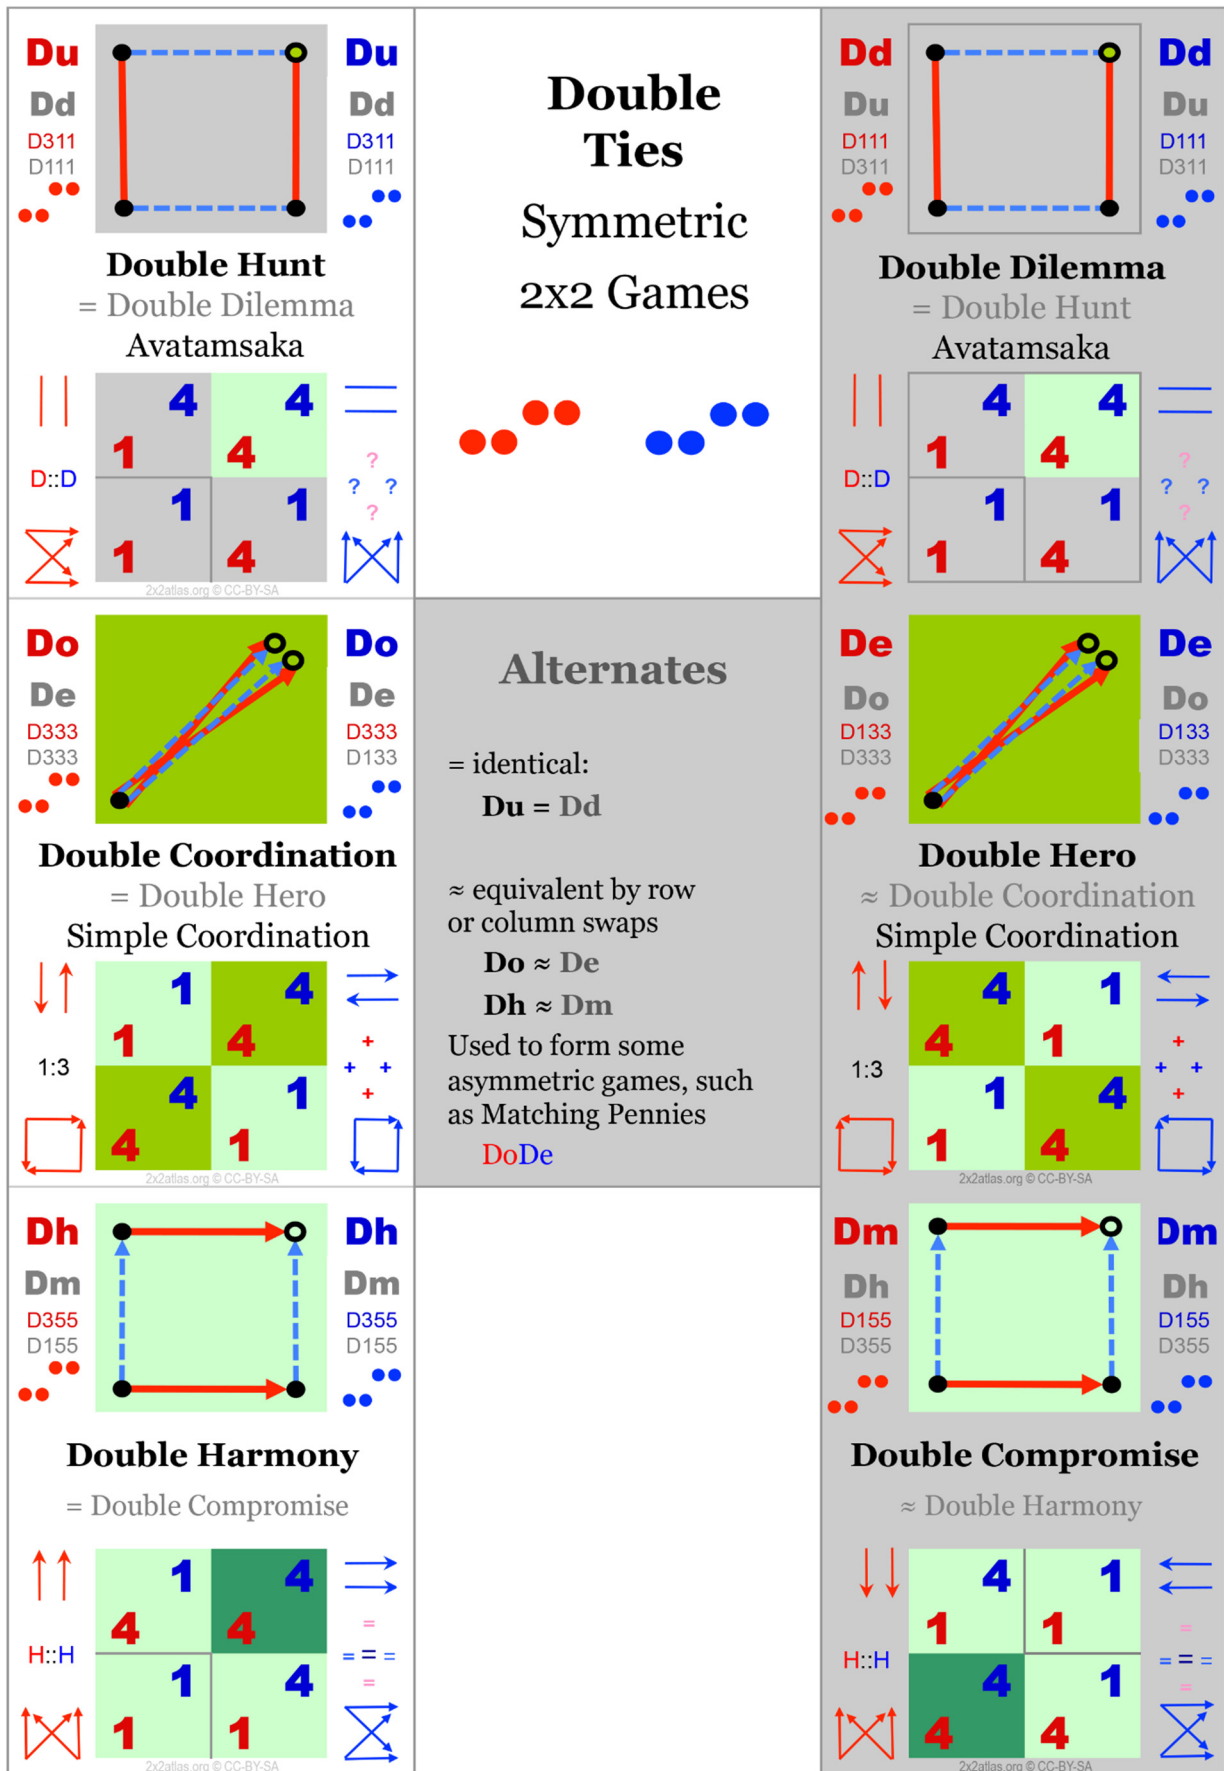

Figure S8. 2 × 2 Game Cards: Double Ties.



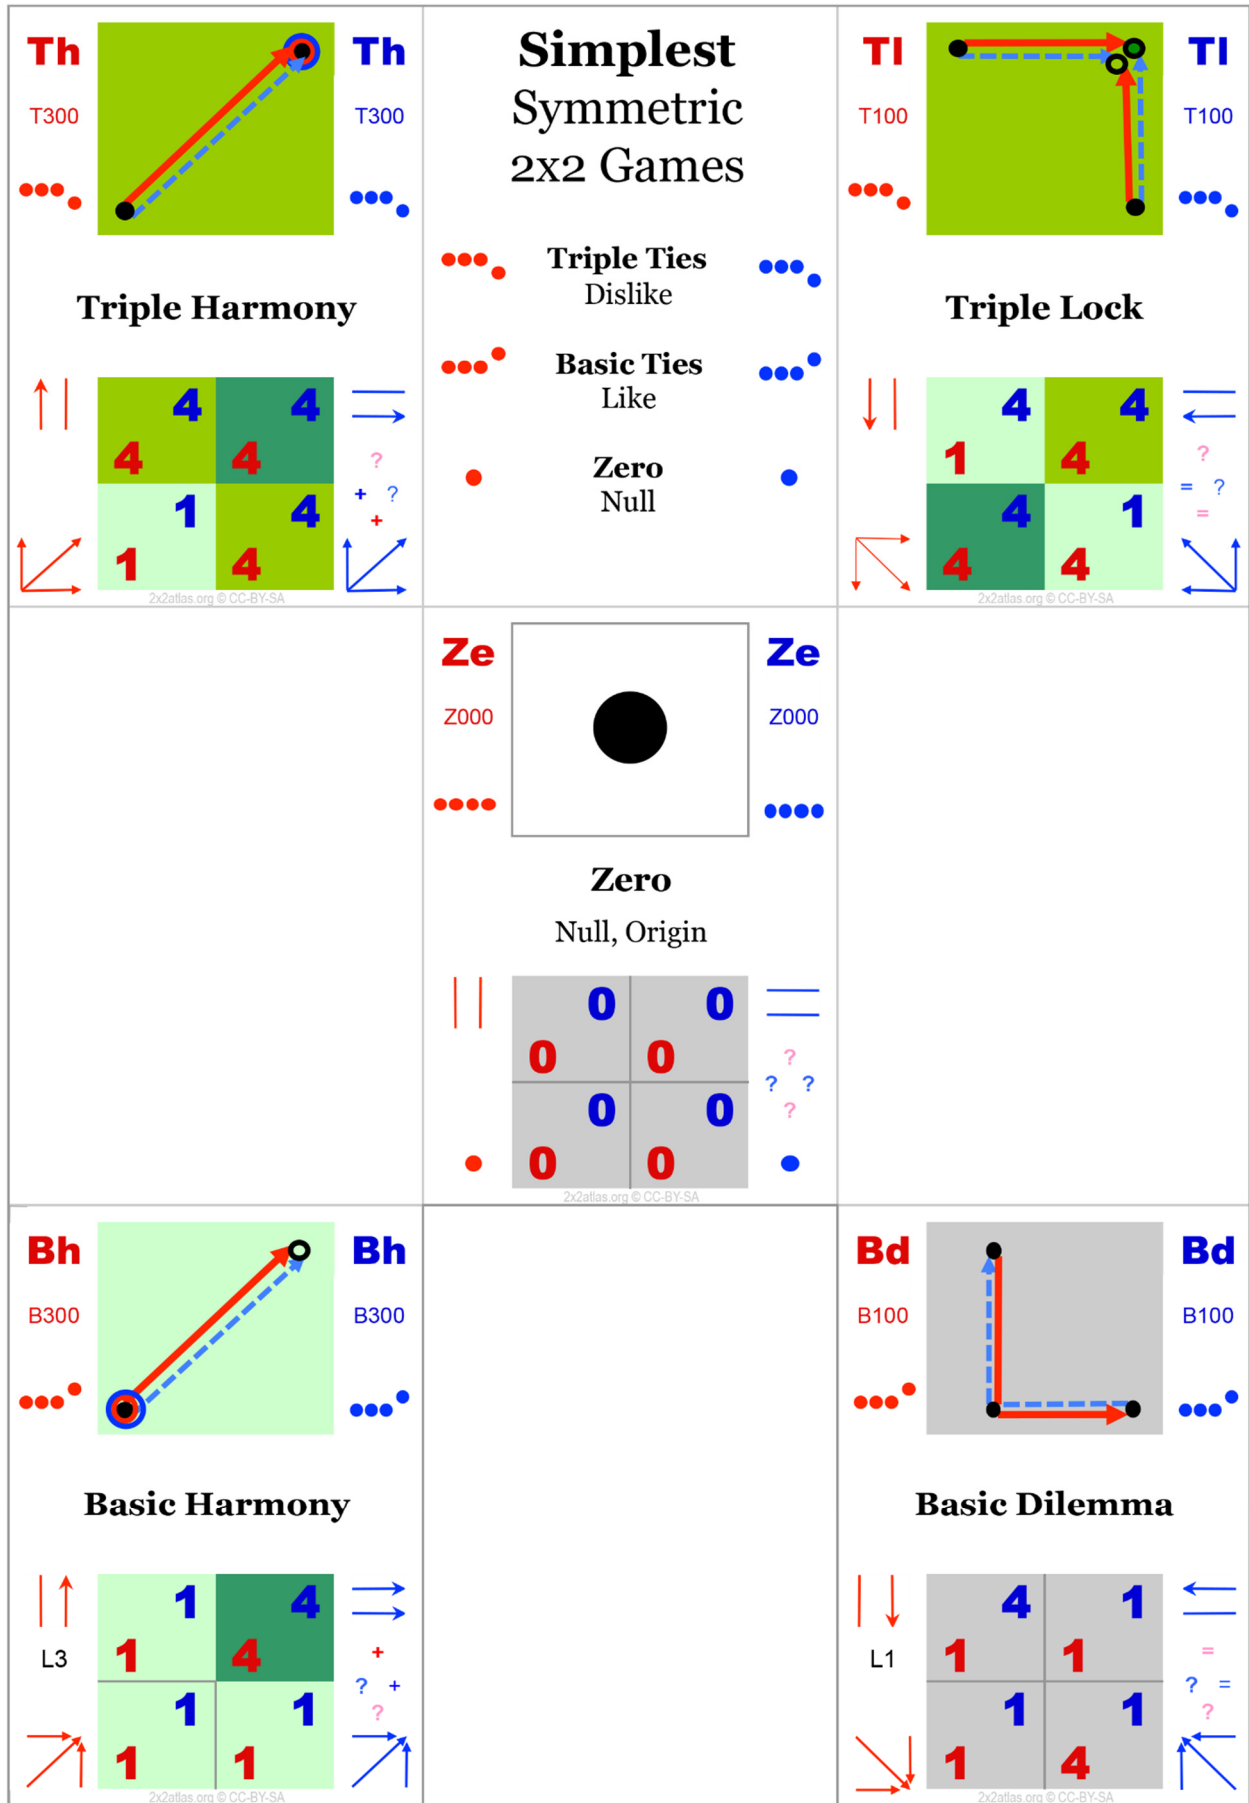

Figure S9. 2 × 2 Game Cards: Simplest.
